# Supplementary material for: Fabrication of a flexible and stretchable three-dimensional conductor based on Au–Ni@graphene coated polyurethane sponge by electroless plating
Source: Royal Society of Chemistry journal article supplement (doi:10.1039/c8tc02413h), 2018-01-01
Supplement: c8tc02413h1.pdf [file c8tc02413h1.pdf]

Electronic Supplementary Material (ESI) for Journal of Materials Chemistry C.

This journal is © The Royal Society of Chemistry 2018

## Electronic Supplementary Information for

### **A Flexible and Stretchable Three-dimensional Conductor Based on Au-Ni@Graphene coated Polyurethane Sponge by Electroless Plating**

*Fei Han<sup>a,c,§</sup> Xingyu Su,<sup>a,b,§</sup> Mingqi Huang,<sup>a</sup> Jinhui Li,<sup>a,d,\*</sup> Yuan Zhang,<sup>a,c</sup> Songfang Zhao,<sup>e</sup> Feng Liu,<sup>a</sup> Bo Zhang,<sup>a</sup> Ying Wang,<sup>a,c</sup> Guoping Zhang,<sup>a,\*</sup> Sun Rong,<sup>a,\*</sup> Ching-Ping Wong<sup>f</sup>*

<sup>a</sup>Guangdong Provincial Key Laboratory of Materials for High Density Electronic Packaging, Shenzhen Institutes of Advanced Technology, Chinese Academy of Sciences, Shenzhen 518055, China. Email: gp.zhang@siat.ac.cn, rong.sun@siat.ac.cn

<sup>b</sup>School of Chemical Engineering, China University of Petroleum, Beijing 102249, China.

<sup>c</sup>Department of Nano Science and Technology Institute, University of Science and Technology of China, Suzhou 215123, China.

<sup>d</sup>Department of Materials Science and Engineering, City University of Hong Kong, 83 Tat Chee Avenue, Kowloon, Hong Kong.

<sup>e</sup>School of Material Science and Engineering, University of Jinan, Jinan 250022, Shandong, China.

<sup>f</sup>School of Materials Science and Engineering, Georgia Institute of Technology, 771 Ferst Drive, Atlanta, Georgia 30332, United States.

<sup>§</sup> These authors contributed equally to this work.

**Contents:**

**Fig. S1.** The optical images of the as-prepared PUS, GPUS, Au-Ni@GPUS, and the flexible conductor.

**Fig. S2.** The designed sandwich structure for the pre-activate of graphene coated PU sponge (GPUS) and the designed circuit diagram for application tests.

**Fig. S3.** The EDS analysis of Ni@GPUS and Au-Ni@GPUS sample.

**Supplementary Video 1.** The dynamic circulatory testing video of LED lamp.

**Supplementary Video 2.** The video of several stretching-releasing cycles when charging a smart cellphone.

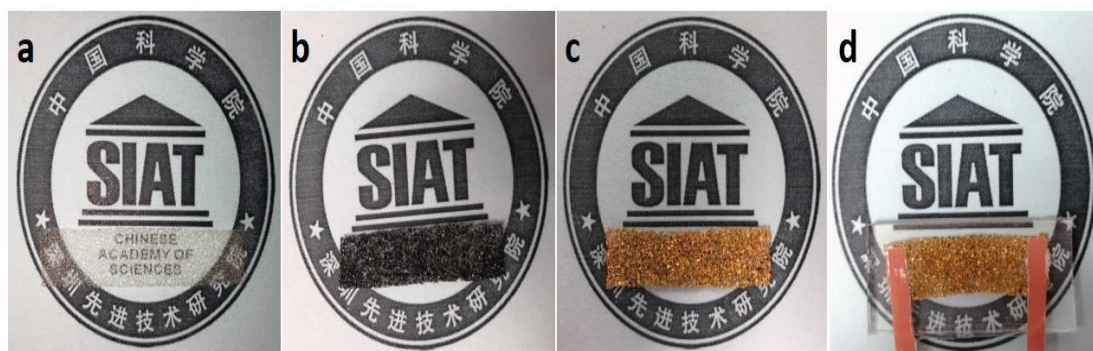

**Fig. S1.** The optical images of the a) as-prepared PUS, b) GPUS, c) Au-Ni@GPUS, d) the flexible conductor, respectively.

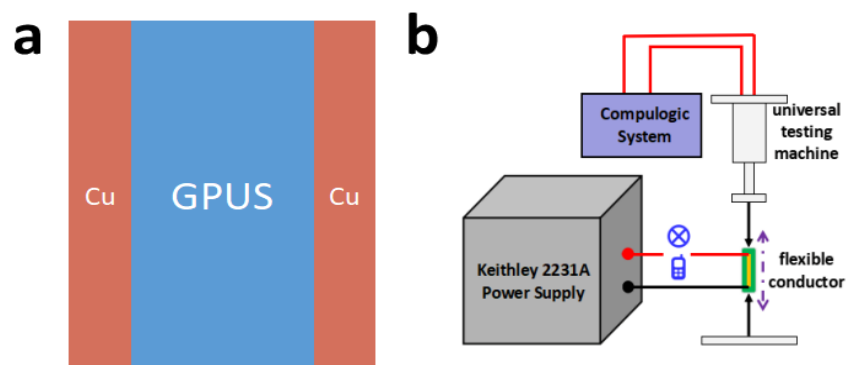

**Fig. S2.** a) The designed sandwich structure for the pre-activate of graphene coated PU sponge (GPUS). b) The designed circuit diagram for application tests.

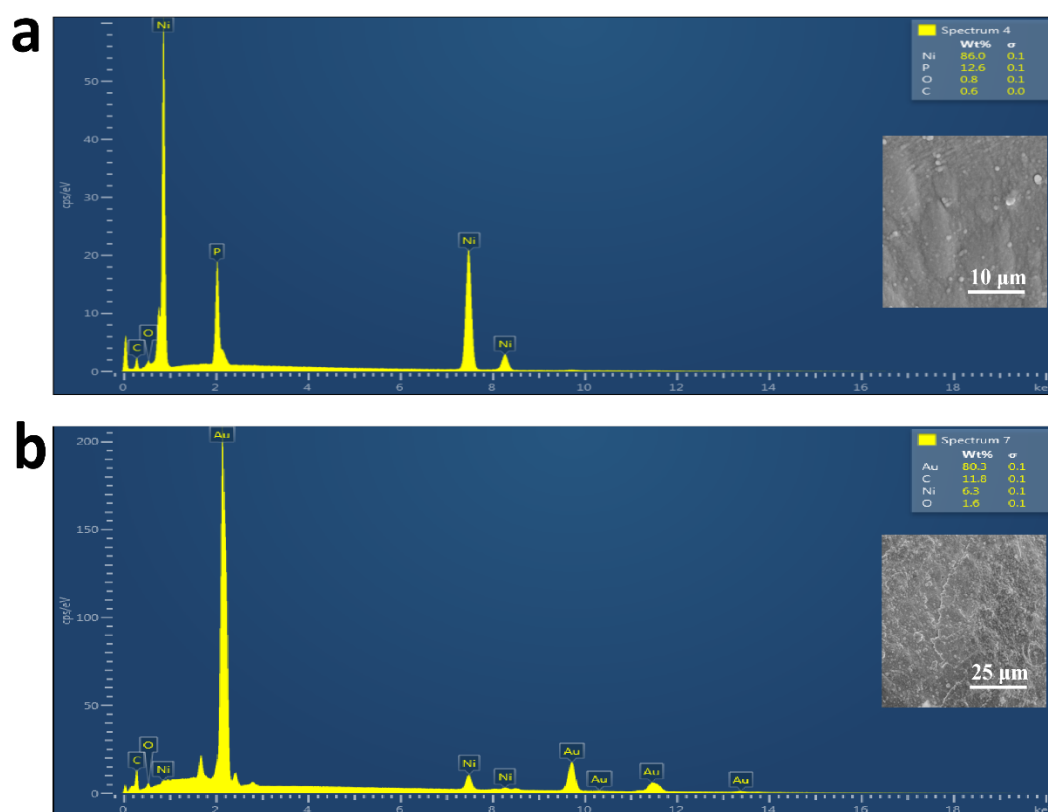

**Fig. S3.** a) EDS analysis of Ni@GPUS sample. b) EDS analysis of Au-Ni@GPUS.
